# Supplementary material for: High-Throughput Sequencing of mGluR Signaling Pathway Genes Reveals Enrichment of Rare Variants in Autism
Source: PLOS journal article supplement (doi:10.1371/journal.pone.0035003), 2012-04-27
Supplement: S4 (10.1371/journal.pone.0035003.s004) [file journal.pone.0035003.s004]

**Table S3. Rare variants detected in AGRE and/or control groups**

| Gene  | RNA Isoform | Nucleotide Change | Amino Acid Change | Consequence or Location | maf >=1%, presumed benign | maf <1%, presumed benign | maf <1%, NOT presumed benign | maf <1%, potentially deleterious |
|-------|-------------|-------------------|-------------------|-------------------------|---------------------------|--------------------------|------------------------------|----------------------------------|
| ARC   | NM_015193.3 | c.382G>A          | D128N             | missense                |                           | Both                     |                              |                                  |
| ARC   | NM_015193.3 | c.489C>T          | D163D             | synonymous              | Both                      |                          |                              |                                  |
| ARC   | NM_015193.3 | c.587C>G          | P196R             | missense                |                           |                          | AGRE                         | AGRE                             |
| ARC   | NM_015193.3 | c.598G>A          | G200S             | missense                |                           |                          | Controls                     | Controls                         |
| ARC   | NM_015193.3 | c.605A>T          | D202V             | missense                |                           |                          | AGRE                         | AGRE                             |
| ARC   | NM_015193.3 | c.607G>A          | G203R             | missense                |                           | Both                     |                              |                                  |
| ARC   | NM_015193.3 | c.642C>T          | F214F             | synonymous              |                           | Both                     |                              |                                  |
| ARC   | NM_015193.3 | c.747G>A          | P249P             | synonymous              |                           | Controls                 |                              |                                  |
| ARC   | NM_015193.3 | c.829G>A          | G277S             | missense                |                           |                          | AGRE                         | AGRE                             |
| ARC   | NM_015193.3 | c.835C>T          | G277S             | synonymous              |                           | Controls                 |                              |                                  |
| ARC   | NM_015193.3 | c.858C>G          | R286R             | synonymous              | Both                      |                          |                              |                                  |
| ARC   | NM_015193.3 | c.870G>A          | L290L             | synonymous              |                           | Controls                 |                              |                                  |
| ARC   | NM_015193.3 | c.873G>A          | P291P             | synonymous              |                           | Controls                 |                              |                                  |
| ARC   | NM_015193.3 | c.885C>T          | G295G             | synonymous              |                           | Controls                 |                              |                                  |
| EIF4E | NM_001968.3 | c.-21G>C          |                   | 5'UTR                   |                           | Both                     |                              |                                  |
| EIF4E | NM_001968.3 | c.318A>G          | K106K             | synonymous              |                           | Controls                 |                              |                                  |
| EIF4E | NM_001968.3 | c.349T>C          | L117L             | synonymous              |                           | Controls                 |                              |                                  |
| EIF4E | NM_001968.3 | c.375C>T          | D125D             | synonymous              | Both                      |                          |                              |                                  |
| EIF4E | NM_001968.3 | c.540-10T>G       |                   | intronic                |                           |                          | AGRE                         |                                  |
| EIF4E | NM_001968.3 | c.622G>A          | G208S             | missense                |                           | Both                     |                              |                                  |
| FMR1  | NM_002024.5 | c.52-3C>T         |                   | intronic                |                           |                          | Controls                     |                                  |
| FMR1  | NM_002024.5 | c.271-19A>G       |                   | intronic                |                           | Both                     |                              |                                  |
| FMR1  | NM_002024.5 | c.413G>A          | R138Q             | missense                |                           |                          | Controls                     | Controls                         |
| FMR1  | NM_002024.5 | c.414G>A          | R138R             | synonymous              | Both                      |                          |                              |                                  |
| FMR1  | NM_002024.5 | c.433G>T          | A145S             | missense                | Controls                  |                          |                              |                                  |
| FMR1  | NM_002024.5 | c.521A>G          | N174S             | missense                |                           |                          | Controls                     | Controls                         |
| FMR1  | NM_002024.5 | c.990+14C>T       |                   | intronic                | Both                      |                          |                              |                                  |
| FMR1  | NM_002024.5 | c.1092T>C         | H364H             | synonymous              |                           | Controls                 |                              |                                  |
| FMR1  | NM_002024.5 | c.1737+8C>A       |                   | intronic                |                           | Both                     |                              |                                  |
| FMR1  | NM_002024.5 | c.1857C>T         | D619D             | synonymous              |                           | Both                     |                              |                                  |
| GRM1  | NM_000838.3 | c.98C>T           | S33L              | missense                |                           | Both                     |                              |                                  |

|      |             |             |        |            |          |          |          |          |
|------|-------------|-------------|--------|------------|----------|----------|----------|----------|
| GRM1 | NM_000838.3 | c.101C>G    | S34C   | missense   |          | Both     |          |          |
| GRM1 | NM_000838.3 | c.624C>T    | D208D  | synonymous |          | AGRE     |          |          |
| GRM1 | NM_000838.3 | c.726C>T    |        | synonymous |          | Controls |          |          |
| GRM1 | NM_000838.3 | c.950+7T>C  |        | intronic   |          | Both     |          |          |
| GRM1 | NM_000838.3 | c.1338C>T   | D446D  | synonymous |          | Controls |          |          |
| GRM1 | NM_000838.3 | c.1488C>T   | H496H  | synonymous |          | Controls |          |          |
| GRM1 | NM_000838.3 | c.1602+9C>G |        | intronic   |          |          | Controls |          |
| GRM1 | NM_000838.3 | c.1643C>T   | T548M  | missense   |          | Both     |          |          |
| GRM1 | NM_000838.3 | c.1750C>T   | R584C  | missense   |          |          | Controls | Controls |
| GRM1 | NM_000838.3 | c.1882C>G   | R628G  | missense   |          |          | AGRE     | AGRE     |
| GRM1 | NM_000838.3 | c.1983C>T   | R661R  | synonymous |          | AGRE     |          |          |
| GRM1 | NM_000838.3 | c.1993G>A   | G665S  | missense   |          | Both     |          |          |
| GRM1 | NM_000838.3 | c.2026G>A   | V676M  | missense   |          |          | Controls | Controls |
| GRM1 | NM_000838.3 | c.2051G>A   | R684H  | missense   |          |          | AGRE     | AGRE     |
| GRM1 | NM_000838.3 | c.2185C>A   | P729T  | missense   | Both     |          |          |          |
| GRM1 | NM_000838.3 | c.2253G>A   |        | synonymous |          | Controls |          |          |
| GRM1 | NM_000838.3 | c.2334C>T   |        | synonymous |          | Both     |          |          |
| GRM1 | NM_000838.3 | c.2340C>T   | N780N  | synonymous |          | AGRE     |          |          |
| GRM1 | NM_000838.3 | c.2581G>A   | G861S  | missense   |          | Both     |          |          |
| GRM1 | NM_000838.3 | c.2651G>A   | G884E  | missense   | Controls |          |          |          |
| GRM1 | NM_000838.3 | c.2725A>C   | M909L  | missense   |          | Both     |          |          |
| GRM1 | NM_000838.3 | c.2785G>A   | V929I  | missense   | AGRE     |          |          |          |
| GRM1 | NM_000838.3 | c.2793G>A   | K931K  | synonymous | Both     |          |          |          |
| GRM1 | NM_000838.3 | c.2859C>T   | T953T  | synonymous |          | AGRE     |          |          |
| GRM1 | NM_000838.3 | c.2922T>C   | P974P  | synonymous |          | Both     |          |          |
| GRM1 | NM_000838.3 | c.2977T>C   | S993P  | missense   | Both     |          |          |          |
| GRM1 | NM_000838.3 | c.3016G>A   | E1006K | missense   |          | Both     |          |          |
| GRM1 | NM_000838.3 | c.3069C>T   |        | synonymous |          | Both     |          |          |
| GRM1 | NM_000838.3 | c.3106G>A   | G1036R | missense   |          |          | Controls | Controls |
| GRM1 | NM_000838.3 | c.3107G>T   | G1036V | missense   |          |          | Controls | Controls |
| GRM1 | NM_000838.3 | c.3168T>G   |        | synonymous | Both     |          |          |          |
| GRM1 | NM_000838.3 | c.3213T>G   |        | synonymous | Both     |          |          |          |
| GRM1 | NM_000838.3 | c.3214C>G   | P1072A | missense   |          |          | Controls | Controls |
| GRM1 | NM_000838.3 | c.3219G>A   | Q1073Q | synonymous |          | Both     |          |          |
| GRM1 | NM_000838.3 | c.3357G>C   | T1119T | synonymous |          | Both     |          |          |

|      |             |              |        |            |          |          |          |          |
|------|-------------|--------------|--------|------------|----------|----------|----------|----------|
| GRM1 | NM_000838.3 | c.3495C>A    | P1165P | synonymous | Both     |          |          |          |
| GRM1 | NM_000838.3 | c.3600C>T    |        | 3'UTR      |          |          | Controls | Controls |
| GRM5 | NM_000842.3 | c.-8T>G      |        | 5'UTR      | Both     |          |          |          |
| GRM5 | NM_000842.3 | c.-17T>G     |        | 5'UTR      | Both     |          |          |          |
| GRM5 | NM_000842.3 | c.20T>A      | L7Q    | missense   |          |          | Controls | Controls |
| GRM5 | NM_000842.3 | c.87T>C      | A29A   | synonymous |          | AGRE     |          |          |
| GRM5 | NM_000842.3 | c.95C>T      | P32L   | missense   | Both     |          |          |          |
| GRM5 | NM_000842.3 | c.96G>A      | P32P   | synonymous |          | Both     |          |          |
| GRM5 | NM_000842.3 | c.151A>G     | K51E   | missense   | Both     |          |          |          |
| GRM5 | NM_000842.3 | c.177G>A     | A59A   | synonymous | Both     |          |          |          |
| GRM5 | NM_000842.3 | c.189G>A     |        | synonymous |          | Controls |          |          |
| GRM5 | NM_000842.3 | c.291C>T     | D97D   | synonymous | Both     |          |          |          |
| GRM5 | NM_000842.3 | c.360A>G     | S120S  | synonymous | Both     |          |          |          |
| GRM5 | NM_000842.3 | c.386G>C     | C129S  | missense   | Controls |          |          |          |
| GRM5 | NM_000842.3 | c.410T>C     | F137S  | missense   | Both     |          |          |          |
| GRM5 | NM_000842.3 | c.412C>T     | R138C  | missense   |          | Both     |          |          |
| GRM5 | NM_000842.3 | c.450C>T     | G150G  | synonymous | Both     |          |          |          |
| GRM5 | NM_000842.3 | c.527G>T     | S176I  | missense   | Both     |          |          |          |
| GRM5 | NM_000842.3 | c.601G>T     | A201S  | missense   | Both     |          |          |          |
| GRM5 | NM_000842.3 | c.651G>A     | V217V  | synonymous | Both     |          |          |          |
| GRM5 | NM_000842.3 | c.657A>C     |        | synonymous |          | Both     |          |          |
| GRM5 | NM_000842.3 | c.661+11T>C  |        | intronic   | Both     |          |          |          |
| GRM5 | NM_000842.3 | c.661+3A>G   |        | intronic   | Both     |          |          |          |
| GRM5 | NM_000842.3 | c.727G>T     | A243S  | missense   |          |          | AGRE     | AGRE     |
| GRM5 | NM_000842.3 | c.738C>A     | Y246*  | nonsense   |          | Both     |          |          |
| GRM5 | NM_000842.3 | c.827G>A     | C276Y  | missense   | Both     |          |          |          |
| GRM5 | NM_000842.3 | c.846G>A     | T282T  | synonymous |          | AGRE     |          |          |
| GRM5 | NM_000842.3 | c.887C>T     | A296V  | missense   | Both     |          |          |          |
| GRM5 | NM_000842.3 | c.911+10A>G  |        | intronic   | Both     |          |          |          |
| GRM5 | NM_000842.3 | c.911+3G>A   |        | intronic   |          |          | AGRE     |          |
| GRM5 | NM_000842.3 | c.1167A>G    | T389T  | synonymous |          | AGRE     |          |          |
| GRM5 | NM_000842.3 | c.1206C>T    | N402N  | synonymous |          | Both     |          |          |
| GRM5 | NM_000842.3 | c.1295T>C    | I432T  | missense   |          |          | Controls | Controls |
| GRM5 | NM_000842.3 | c.1358C>T    | T453M  | missense   |          | Both     |          |          |
| GRM5 | NM_000842.3 | c.1394+14A>G |        | intronic   |          |          | Controls |          |

|        |             |              |        |            |      |          |          |          |
|--------|-------------|--------------|--------|------------|------|----------|----------|----------|
| GRM5   | NM_000842.3 | c.1417G>C    | E473Q  | missense   |      |          | AGRE     | AGRE     |
| GRM5   | NM_000842.3 | c.1496T>C    | V499A  | missense   |      |          | Controls | Controls |
| GRM5   | NM_000842.3 | c.1563+8G>A  |        | intronic   |      |          | AGRE     |          |
| GRM5   | NM_000842.3 | c.1691-4G>T  |        | intronic   |      |          | AGRE     |          |
| GRM5   | NM_000842.3 | c.1731C>T    |        | synonymous |      | Controls |          |          |
| GRM5   | NM_000842.3 | c.2034G>A    | K678K  | synonymous |      | Both     |          |          |
| GRM5   | NM_000842.3 | c.2127T>A    | V709V  | synonymous |      | AGRE     |          |          |
| GRM5   | NM_000842.3 | c.2220T>G    |        | synonymous |      | Controls |          |          |
| GRM5   | NM_000842.3 | c.2339C>T    | T780M  | missense   |      |          | Controls | Controls |
| GRM5   | NM_000842.3 | c.2379T>C    | F793F  | synonymous |      | AGRE     |          |          |
| GRM5   | NM_000842.3 | c.2497G>A    | V833M  | missense   |      |          | Controls | Controls |
| GRM5   | NM_000842.3 | c.2630+10G>A |        | intronic   |      |          | AGRE     |          |
| GRM5   | NM_000842.3 | c.2652G>A    | T884T  | synonymous |      | AGRE     |          |          |
| GRM5   | NM_000842.3 | c.2705C>T    | S902F  | missense   |      | Both     |          |          |
| GRM5   | NM_000842.3 | c.2942C>A    | P981H  | missense   |      | Both     |          |          |
| GRM5   | NM_000842.3 | c.2943C>A    | P981P  | synonymous |      | Both     |          |          |
| GRM5   | NM_000842.3 | c.2943C>T    | P981P  | synonymous | Both |          |          |          |
| GRM5   | NM_000842.3 | c.2945C>A    | A982E  | missense   |      | Both     |          |          |
| GRM5   | NM_000842.3 | c.2945C>T    | A982V  | missense   | Both |          |          |          |
| GRM5   | NM_000842.3 | c.2954G>A    | R985H  | missense   |      | Both     |          |          |
| GRM5   | NM_000842.3 | c.2954G>T    | R985L  | missense   | AGRE |          |          |          |
| GRM5   | NM_000842.3 | c.2964G>A    |        | synonymous |      | Controls |          |          |
| GRM5   | NM_000842.3 | c.2968A>G    | I990V  | missense   |      |          | Controls | Controls |
| GRM5   | NM_000842.3 | c.3123C>T    | S1041S | synonymous |      | AGRE     |          |          |
| GRM5   | NM_000842.3 | c.3157C>T    | P1053S | missense   |      | Both     |          |          |
| GRM5   | NM_000842.3 | c.3279A>C    |        | synonymous | Both |          |          |          |
| GRM5   | NM_000842.3 | c.3349G>A    | E1117K | missense   |      | Both     |          |          |
| GRM5   | NM_000842.3 | c.3349G>T    | E1117* | nonsense   | AGRE |          |          |          |
| GRM5   | NM_000842.3 | c.3351G>A    | E1117E | synonymous |      | Both     |          |          |
| GRM5   | NM_000842.3 | c.3354T>A    | A1118A | synonymous |      | Both     |          |          |
| GRM5   | NM_000842.3 | c.3503T>C    | L1168P | missense   |      |          | AGRE     | AGRE     |
| HOMER1 | NM_004272.3 | c.6-4G>T     |        | intronic   | Both |          |          |          |
| HOMER1 | NM_004272.3 | c.45A>G      | Q15Q   | synonymous | Both |          |          |          |
| HOMER1 | NM_004272.3 | c.162+19G>T  |        | intronic   |      |          | AGRE     |          |
| HOMER1 | NM_004272.3 | c.195G>T     | M65I   | missense   |      |          | AGRE     | AGRE     |

|        |             |             |       |            |          |          |          |          |
|--------|-------------|-------------|-------|------------|----------|----------|----------|----------|
| HOMER1 | NM_004272.3 | c.290C>T    | S97L  | missense   |          |          | AGRE     | AGRE     |
| HOMER1 | NM_004272.3 | c.295-12C>T |       | intronic   | Both     |          |          |          |
| HOMER1 | NM_004272.3 | c.387+18A>G |       | intronic   | Both     |          |          |          |
| HOMER1 | NM_004272.3 | c.400G>A    | G134R | missense   |          | Both     |          |          |
| HOMER1 | NM_004272.3 | c.425C>T    | P142L | missense   |          |          | AGRE     | AGRE     |
| HOMER1 | NM_004272.3 | c.511T>C    | L171L | synonymous |          | Controls |          |          |
| HOMER1 | NM_004272.3 | c.528-11T>G |       | intronic   |          |          | AGRE     |          |
| HOMER1 | NM_004272.3 | c.968G>A    | R323H | missense   |          |          | AGRE     | AGRE     |
| HOMER1 | NM_004272.3 | c.1080C>T   |       | 3'UTR      |          |          | AGRE     | AGRE     |
| HRAS   | NM_176795.3 | c.-10C>T    |       | 5'UTR      | Both     |          |          |          |
| HRAS   | NM_176795.3 | c.81T>C     | H27H  | synonymous | Both     |          |          |          |
| HRAS   | NM_176795.3 | c.111+15G>A |       | intronic   | Both     |          |          |          |
| HRAS   | NM_176795.3 | c.249C>T    |       | synonymous |          | Both     |          |          |
| HRAS   | NM_176795.3 | c.357C>T    |       | synonymous |          | Controls |          |          |
| HRAS   | NM_176795.3 | c.383G>A    | R128Q | missense   |          |          | AGRE     | AGRE     |
| HRAS   | NM_176795.3 | c.498C>G    | P166P | synonymous |          | AGRE     |          |          |
| MAP2K1 | NM_002755.3 | c.-2A>G     |       | 5'UTR      |          | Both     |          |          |
| MAP2K1 | NM_002755.3 | c.292-3C>T  |       | intronic   |          | Both     |          |          |
| MAP2K1 | NM_002755.3 | c.315C>T    | P105P | synonymous |          | AGRE     |          |          |
| MAP2K1 | NM_002755.3 | c.371C>T    | P124L | missense   |          | Both     |          |          |
| MAP2K1 | NM_002755.3 | c.438+20C>T |       | intronic   | Both     |          |          |          |
| MAP2K1 | NM_002755.3 | c.711G>A    | G237G | synonymous | Controls | AGRE     |          |          |
| MAP2K1 | NM_002755.3 | c.1003C>G   | Q335E | missense   |          |          | Controls | Controls |
| MAP2K1 | NM_002755.3 | c.1023-8C>T |       | intronic   | Both     |          |          |          |
| MAP2K2 | NM_030662.3 | c.90C>T     |       | synonymous |          | Controls |          |          |
| MAP2K2 | NM_030662.3 | c.93-20A>C  |       | intronic   |          |          | AGRE     |          |
| MAP2K2 | NM_030662.3 | c.100C>T    | L34L  | synonymous |          | Controls |          |          |
| MAP2K2 | NM_030662.3 | c.192C>T    | V64V  | synonymous | Both     |          |          |          |
| MAP2K2 | NM_030662.3 | c.258C>A    | V86V  | synonymous |          | AGRE     |          |          |
| MAP2K2 | NM_030662.3 | c.303+18G>A |       | intronic   | Controls |          |          |          |
| MAP2K2 | NM_030662.3 | c.405G>C    | G135G | synonymous |          | Both     |          |          |
| MAP2K2 | NM_030662.3 | c.420C>T    | D140D | synonymous |          | AGRE     |          |          |
| MAP2K2 | NM_030662.3 | c.450+15G>T |       | intronic   |          | Both     |          |          |
| MAP2K2 | NM_030662.3 | c.453C>T    | D151D | synonymous | Both     |          |          |          |
| MAP2K2 | NM_030662.3 | c.454G>A    | G152S | missense   |          | Both     |          |          |

|        |             |              |       |             |      |          |          |          |
|--------|-------------|--------------|-------|-------------|------|----------|----------|----------|
| MAP2K2 | NM_030662.3 | c.498C>T     | P166P | synonymous  |      | Both     |          |          |
| MAP2K2 | NM_030662.3 | c.528+20A>G  |       | intronic    |      | Both     |          |          |
| MAP2K2 | NM_030662.3 | c.528G>A     | A176A | synonymous  |      | AGRE     |          |          |
| MAP2K2 | NM_030662.3 | c.580+6G>A   |       | intronic    |      | Both     |          |          |
| MAP2K2 | NM_030662.3 | c.581-1G>T   |       | splice-site |      |          | AGRE     | AGRE     |
| MAP2K2 | NM_030662.3 | c.660C>A     | I220I | synonymous  | Both |          |          |          |
| MAP2K2 | NM_030662.3 | c.678C>T     |       | synonymous  |      | Both     |          |          |
| MAP2K2 | NM_030662.3 | c.690G>A     | T230T | synonymous  |      | Controls |          |          |
| MAP2K2 | NM_030662.3 | c.846C>T     | P282P | synonymous  |      | Both     |          |          |
| MAP2K2 | NM_030662.3 | c.889C>T     | R297W | missense    |      |          | AGRE     | AGRE     |
| MAP2K2 | NM_030662.3 | c.903C>T     | P301P | synonymous  |      | Both     |          |          |
| MAP2K2 | NM_030662.3 | c.919+12A>G  |       | intronic    | Both |          |          |          |
| MAP2K2 | NM_030662.3 | c.981C>T     | N327N | synonymous  |      | Controls |          |          |
| MAP2K2 | NM_030662.3 | c.985-18C>T  |       | intronic    |      | Both     |          |          |
| MAP2K2 | NM_030662.3 | c.1074G>A    |       | synonymous  |      | Both     |          |          |
| MAP2K2 | NM_030662.3 | c.1140C>T    | A380A | synonymous  |      | Controls |          |          |
| MAP2K2 | NM_030662.3 | c.1141G>C    | G381R | missense    |      |          | Controls | Controls |
| MAP2K2 | NM_030662.3 | c.1211C>T    |       | 3'UTR       |      | Both     |          |          |
| MAP2K2 | NM_030662.3 | c.1217C>T    |       | 3'UTR       |      |          | AGRE     | AGRE     |
| MAP2K2 | NM_030662.3 | c.1222C>T    |       | 3'UTR       |      | Both     |          |          |
| MAP2K2 | NM_030662.3 | c.1227C>T    |       | 3'UTR       | Both |          |          |          |
| PIK3CA | NM_006218.2 | c.50C>A      | P17H  | missense    |      |          | Controls | Controls |
| PIK3CA | NM_006218.2 | c.363C>T     | I121I | synonymous  | Both |          |          |          |
| PIK3CA | NM_006218.2 | c.466C>T     | L156F | missense    |      |          | Controls | Controls |
| PIK3CA | NM_006218.2 | c.1060-17C>A |       | intronic    | Both |          |          |          |
| PIK3CA | NM_006218.2 | c.1060-18C>A |       | intronic    |      | Both     |          |          |
| PIK3CA | NM_006218.2 | c.1143C>G    | P381P | synonymous  |      | AGRE     |          |          |
| PIK3CA | NM_006218.2 | c.1173A>G    | I391M | missense    | Both |          |          |          |
| PIK3CA | NM_006218.2 | c.1544A>G    | N515S | missense    |      |          | AGRE     | AGRE     |
| PIK3CA | NM_006218.2 | c.1747-13T>C |       | intronic    | Both |          |          |          |
| PIK3CA | NM_006218.2 | c.1788A>G    | E596E | synonymous  |      | AGRE     |          |          |
| PIK3CA | NM_006218.2 | c.1837G>A    | G613S | missense    | Both |          |          |          |
| PIK3CA | NM_006218.2 | c.1850G>A    | R617Q | missense    | Both |          |          |          |
| PIK3CA | NM_006218.2 | c.1876G>A    | D626N | missense    | Both |          |          |          |
| PIK3CA | NM_006218.2 | c.1911G>A    | Q637Q | synonymous  | Both |          |          |          |

|        |             |              |        |             |      |      |          |          |
|--------|-------------|--------------|--------|-------------|------|------|----------|----------|
| PIK3CA | NM_006218.2 | c.1912-12G>T |        | intronic    | Both |      |          |          |
| PIK3CA | NM_006218.2 | c.1930T>C    | Y644H  | missense    | Both |      |          |          |
| PIK3CA | NM_006218.2 | c.2016-12C>T |        | intronic    | Both |      |          |          |
| PIK3CA | NM_006218.2 | c.2038G>C    | V680L  | missense    | Both |      |          |          |
| PIK3CA | NM_006218.2 | c.2102A>C    | H701P  | missense    |      | Both |          |          |
| PIK3CA | NM_006218.2 | c.2119G>A    | E707K  | missense    | Both |      |          |          |
| PIK3CA | NM_006218.2 | c.2155C>G    | L719V  | missense    | Both |      |          |          |
| PIK3CA | NM_006218.2 | c.2187+16T>C |        | intronic    | Both |      |          |          |
| PIK3CA | NM_006218.2 | c.2187+1G>T  |        | splice-site | Both |      |          |          |
| PIK3CA | NM_006218.2 | c.2294+19C>T |        | intronic    |      |      | AGRE     |          |
| PIK3CA | NM_006218.2 | c.2439A>G    | T813T  | synonymous  |      | AGRE |          |          |
| PIK3CA | NM_006218.2 | c.3075C>T    | T1025T | synonymous  |      | AGRE |          |          |
| PIK3R1 | NM_181523.1 | c.219C>T     | Y73Y   | synonymous  | Both |      |          |          |
| PIK3R1 | NM_181523.1 | c.334+14A>C  |        | intronic    | Both |      |          |          |
| PIK3R1 | NM_181523.1 | c.427+5C>A   |        | intronic    |      |      | Controls |          |
| PIK3R1 | NM_181523.1 | c.428-18G>A  |        | intronic    |      |      | Controls |          |
| PIK3R1 | NM_181523.1 | c.621T>C     | I207I  | synonymous  | Both |      |          |          |
| PIK3R1 | NM_181523.1 | c.634+8T>C   |        | intronic    |      | Both |          |          |
| PIK3R1 | NM_181523.1 | c.635-9A>G   |        | intronic    |      |      | AGRE     |          |
| PIK3R1 | NM_181523.1 | c.687G>A     | S229S  | synonymous  |      | Both |          |          |
| PIK3R1 | NM_181523.1 | c.837-13C>T  |        | intronic    |      |      | AGRE     |          |
| PIK3R1 | NM_181523.1 | c.889G>A     | E297K  | missense    |      |      | AGRE     | AGRE     |
| PIK3R1 | NM_181523.1 | c.902G>A     | R301Q  | missense    |      | Both |          |          |
| PIK3R1 | NM_181523.1 | c.917-10T>G  |        | intronic    |      |      | AGRE     |          |
| PIK3R1 | NM_181523.1 | c.978G>A     | M326I  | missense    | Both |      |          |          |
| PIK3R1 | NM_181523.1 | c.1176C>T    | F392F  | synonymous  | Both |      |          |          |
| PIK3R1 | NM_181523.1 | c.1426-20T>G |        | intronic    |      |      | Controls |          |
| PIK3R1 | NM_181523.1 | c.2109T>C    | L703L  | synonymous  |      | Both |          |          |
| PIK3R1 | NM_181523.1 | c.2178C>T    |        | 3'UTR       | Both |      |          |          |
| PTEN   | NM_000314.4 | c.132C>T     | G44G   | synonymous  |      | Both |          |          |
| PTEN   | NM_000314.4 | c.425G>A     | R142Q  | missense    |      | Both |          |          |
| PTEN   | NM_000314.4 | c.802-17T>C  |        | intronic    |      | Both |          |          |
| PTEN   | NM_000314.4 | c.802-18C>T  |        | intronic    | Both |      |          |          |
| PTEN   | NM_000314.4 | c.802-19T>C  |        | intronic    |      | Both |          |          |
| RAF1   | NM_002880.3 | c.119G>A     | R40H   | missense    |      |      | Controls | Controls |



|        |                |              |       |            |      |          |          |          |
|--------|----------------|--------------|-------|------------|------|----------|----------|----------|
| RAF1   | NM_002880.3    | c.122G>A     | R41Q  | missense   |      |          | AGRE     | AGRE     |
| RAF1   | NM_002880.3    | c.356C>T     | A119V | missense   |      |          | AGRE     | AGRE     |
| RAF1   | NM_002880.3    | c.923C>T     | P308L | missense   |      |          | Controls | Controls |
| RAF1   | NM_002880.3    | c.1422A>C    |       | synonymous |      | Both     |          |          |
| RAF1   | NM_002880.3    | c.1668+19G>T |       | intronic   |      | Both     |          |          |
| RAF1   | NM_002880.3    | c.1669-13T>C |       | intronic   |      | Both     |          |          |
| RAF1   | NM_002880.3    | c.1755A>G    | V585V | synonymous |      | Both     |          |          |
| RAF1   | NM_002880.3    | c.1830A>G    | Q610Q | synonymous |      | Both     |          |          |
| RAF1   | NM_002880.3    | c.1941C>T    | V647V | synonymous | AGRE | Controls |          |          |
| RHEB   | NM_005614.3    | c.333-7C>T   |       | intronic   | Both |          |          |          |
| RHEB   | NM_005614.3    | c.514G>A     | G172R | missense   |      | Both     |          |          |
| SHANK3 | NM_001080420.1 | c.64-18G>A   |       | intronic   |      | Both     |          |          |
| SHANK3 | NM_001080420.1 | c.448+16G>A  |       | intronic   | Both |          |          |          |
| SHANK3 | NM_001080420.1 | c.522C>T     |       | synonymous |      | AGRE     |          |          |
| SHANK3 | NM_001080420.1 | c.612C>A     | D204E | missense   |      |          | AGRE     | AGRE     |
| SHANK3 | NM_001080420.1 | c.734T>C     | I245T | missense   | Both |          |          |          |
| SHANK3 | NM_001080420.1 | c.763C>T     | H255Y | missense   |      |          | AGRE     | AGRE     |
| SHANK3 | NM_001080420.1 | c.769-7C>G   |       | intronic   |      |          | AGRE     |          |
| SHANK3 | NM_001080420.1 | c.885+5G>T   |       | intronic   |      | Both     |          |          |
| SHANK3 | NM_001080420.1 | c.886-8C>T   |       | intronic   |      | Both     |          |          |
| SHANK3 | NM_001080420.1 | c.891C>T     | S297S | synonymous |      | Both     |          |          |
| SHANK3 | NM_001080420.1 | c.898C>T     | R300C | missense   |      |          | AGRE     | AGRE     |
| SHANK3 | NM_001080420.1 | c.920C>G     | A307G | missense   |      |          | AGRE     | AGRE     |
| SHANK3 | NM_001080420.1 | c.976G>A     | A326T | missense   |      |          | Controls | Controls |
| SHANK3 | NM_001080420.1 | c.1030+13C>T |       | intronic   |      |          | Controls |          |
| SHANK3 | NM_001080420.1 | c.1031-14C>T |       | intronic   |      |          | AGRE     |          |
| SHANK3 | NM_001080420.1 | c.1074G>A    |       | synonymous |      | Controls |          |          |
| SHANK3 | NM_001080420.1 | c.1191C>T    |       | synonymous |      | Both     |          |          |
| SHANK3 | NM_001080420.1 | c.1211G>A    | R404Q | missense   |      | Both     |          |          |
| SHANK3 | NM_001080420.1 | c.1245C>T    |       | synonymous |      | Controls |          |          |
| SHANK3 | NM_001080420.1 | c.1254G>A    | E418E | synonymous |      | AGRE     |          |          |
| SHANK3 | NM_001080420.1 | c.1293A>G    |       | synonymous |      | Controls |          |          |
| SHANK3 | NM_001080420.1 | c.1305-15G>A |       | intronic   |      | Both     |          |          |
| SHANK3 | NM_001080420.1 | c.1305-16G>A |       | intronic   |      | Both     |          |          |
| SHANK3 | NM_001080420.1 | c.1305-17G>A |       | intronic   |      | Both     |          |          |



|        |                |              |       |            |      |          |      |      |
|--------|----------------|--------------|-------|------------|------|----------|------|------|
| SHANK3 | NM_001080420.1 | c.1315C>T    | P439S | missense   |      |          | AGRE | AGRE |
| SHANK3 | NM_001080420.1 | c.1332G>A    |       | synonymous |      | Both     |      |      |
| SHANK3 | NM_001080420.1 | c.1334G>A    | G445E | missense   |      | Both     |      |      |
| SHANK3 | NM_001080420.1 | c.1335G>T    |       | synonymous |      | AGRE     |      |      |
| SHANK3 | NM_001080420.1 | c.1336G>A    | G446R | missense   |      | Both     |      |      |
| SHANK3 | NM_001080420.1 | c.1337G>A    | G446E | missense   |      | Both     |      |      |
| SHANK3 | NM_001080420.1 | c.1337G>C    | G446A | missense   |      | Both     |      |      |
| SHANK3 | NM_001080420.1 | c.1337G>T    | G446V | missense   |      |          | AGRE | AGRE |
| SHANK3 | NM_001080420.1 | c.1340C>T    | A447V | missense   |      | Both     |      |      |
| SHANK3 | NM_001080420.1 | c.1660+18T>C |       | intronic   | Both |          |      |      |
| SHANK3 | NM_001080420.1 | c.1661-8C>T  |       | intronic   |      | Both     |      |      |
| SHANK3 | NM_001080420.1 | c.1717G>A    | D573N | missense   |      | Both     |      |      |
| SHANK3 | NM_001080420.1 | c.1736+18G>A |       | intronic   | Both |          |      |      |
| SHANK3 | NM_001080420.1 | c.1819+16T>A |       | intronic   |      | Both     |      |      |
| SHANK3 | NM_001080420.1 | c.1891G>A    | V631M | missense   |      | Both     |      |      |
| SHANK3 | NM_001080420.1 | c.1911G>A    |       | synonymous |      | Both     |      |      |
| SHANK3 | NM_001080420.1 | c.1944+19G>C |       | intronic   | Both |          |      |      |
| SHANK3 | NM_001080420.1 | c.1947G>T    | V649V | synonymous |      | Controls |      |      |
| SHANK3 | NM_001080420.1 | c.1968G>A    | K656K | synonymous |      | Controls |      |      |
| SHANK3 | NM_001080420.1 | c.2077+10C>A |       | intronic   |      |          | AGRE |      |
| SHANK3 | NM_001080420.1 | c.2079C>T    |       | synonymous |      | Both     |      |      |
| SHANK3 | NM_001080420.1 | c.2084C>T    | P695L | missense   |      | Both     |      |      |
| SHANK3 | NM_001080420.1 | c.2091C>G    | P697P | synonymous |      | Both     |      |      |
| SHANK3 | NM_001080420.1 | c.2101C>T    | P701S | missense   |      | Both     |      |      |
| SHANK3 | NM_001080420.1 | c.2102C>T    | P701L | missense   |      | Both     |      |      |
| SHANK3 | NM_001080420.1 | c.2119C>T    |       | synonymous |      | Controls |      |      |
| SHANK3 | NM_001080420.1 | c.2158+10G>A |       | intronic   |      | Both     |      |      |
| SHANK3 | NM_001080420.1 | c.2183-20G>A |       | intronic   |      | Both     |      |      |
| SHANK3 | NM_001080420.1 | c.2194G>A    | E732K | missense   |      | Both     |      |      |
| SHANK3 | NM_001080420.1 | c.2209G>A    | A737T | missense   | Both |          |      |      |
| SHANK3 | NM_001080420.1 | c.2223G>A    | T741T | synonymous |      | Both     |      |      |
| SHANK3 | NM_001080420.1 | c.2259C>T    | A753A | synonymous |      | Both     |      |      |
| SHANK3 | NM_001080420.1 | c.2313+20G>A |       | intronic   |      |          | AGRE |      |
| SHANK3 | NM_001080420.1 | c.2358G>A    | P786P | synonymous |      | Both     |      |      |
| SHANK3 | NM_001080420.1 | c.2359G>A    | G787S | missense   |      | Both     |      |      |

|        |                |              |        |            |      |          |          |          |
|--------|----------------|--------------|--------|------------|------|----------|----------|----------|
| SHANK3 | NM_001080420.1 | c.2398+11G>A |        | intronic   |      |          | AGRE     |          |
| SHANK3 | NM_001080420.1 | c.249G>T     | T83T   | synonymous |      | AGRE     |          |          |
| SHANK3 | NM_001080420.1 | c.3360C>T    |        | synonymous |      | AGRE     |          |          |
| SHANK3 | NM_001080420.1 | c.3382C>T    |        | synonymous |      | Both     |          |          |
| SHANK3 | NM_001080420.1 | c.3411C>T    | S1137S | synonymous |      | Both     |          |          |
| SHANK3 | NM_001080420.1 | c.3568C>T    | R1190C | missense   |      |          | Controls | Controls |
| SHANK3 | NM_001080420.1 | c.3585G>A    | K1195K | synonymous | AGRE | Controls |          |          |
| SHANK3 | NM_001080420.1 | c.3708G>A    | E1236E | synonymous |      | AGRE     |          |          |
| SHANK3 | NM_001080420.1 | c.3761C>T    | A1254V | missense   |      |          | AGRE     | AGRE     |
| SHANK3 | NM_001080420.1 | c.3764C>T    | P1255L | missense   |      |          | AGRE     | AGRE     |
| SHANK3 | NM_001080420.1 | c.3765G>A    |        | synonymous |      | AGRE     |          |          |
| SHANK3 | NM_001080420.1 | c.3836C>T    | P1279L | missense   |      |          | AGRE     | AGRE     |
| SHANK3 | NM_001080420.1 | c.3850C>T    | P1284S | missense   |      |          | Controls | Controls |
| SHANK3 | NM_001080420.1 | c.3927C>T    | S1309S | synonymous |      | Both     |          |          |
| SHANK3 | NM_001080420.1 | c.4025C>T    | P1342L | missense   |      |          | AGRE     | AGRE     |
| SHANK3 | NM_001080420.1 | c.4050C>T    |        | synonymous |      | AGRE     |          |          |
| SHANK3 | NM_001080420.1 | c.4082C>T    | P1361L | missense   |      | Both     |          |          |
| SHANK3 | NM_001080420.1 | c.4149C>T    | D1383D | synonymous |      | Both     |          |          |
| SHANK3 | NM_001080420.1 | c.4325C>T    | P1442L | missense   |      | Both     |          |          |
| SHANK3 | NM_001080420.1 | c.4362G>A    |        | synonymous |      | Both     |          |          |
| SHANK3 | NM_001080420.1 | c.4368C>T    | S1456S | synonymous |      | AGRE     |          |          |
| SHANK3 | NM_001080420.1 | c.4405G>C    | G1469R | missense   |      |          | AGRE     | AGRE     |
| SHANK3 | NM_001080420.1 | c.4406G>A    | G1469E | missense   |      | Both     |          |          |
| SHANK3 | NM_001080420.1 | c.4406G>T    | G1469V | missense   |      |          | AGRE     | AGRE     |
| SHANK3 | NM_001080420.1 | c.4479C>T    |        | synonymous |      | AGRE     |          |          |
| SHANK3 | NM_001080420.1 | c.4490G>A    | R1497Q | missense   |      |          | AGRE     | AGRE     |
| SHANK3 | NM_001080420.1 | c.4501G>A    | G1501R | missense   |      | Both     |          |          |
| SHANK3 | NM_001080420.1 | c.4641C>T    | I1547I | synonymous |      | AGRE     |          |          |
| SHANK3 | NM_001080420.1 | c.4652+12G>A |        | intronic   |      | Both     |          |          |
| SHANK3 | NM_001080420.1 | c.4669G>A    | G1557S | missense   |      | Both     |          |          |
| SHANK3 | NM_001080420.1 | c.4708G>A    | G1570S | missense   |      | Both     |          |          |
| SHANK3 | NM_001080420.1 | c.4720G>A    | G1574R | missense   |      |          | AGRE     | AGRE     |
| SHANK3 | NM_001080420.1 | c.4995C>T    |        | synonymous |      | Both     |          |          |
| SHANK3 | NM_001080420.1 | c.5071G>A    | D1691N | missense   |      | Both     |          |          |
| SHANK3 | NM_001080420.1 | c.5089C>T    | H1697Y | missense   |      | Both     |          |          |

|        |                |              |        |            |          |          |          |      |
|--------|----------------|--------------|--------|------------|----------|----------|----------|------|
| SHANK3 | NM_001080420.1 | c.5098G>A    | E1700K | missense   |          | Both     |          |      |
| SHANK3 | NM_001080420.1 | c.5106C>T    |        | synonymous |          | AGRE     |          |      |
| SHANK3 | NM_001080420.1 | c.5164G>A    | D1722N | missense   |          | Both     |          |      |
| TSC1   | NM_000368.4    | c.-7C>T      |        | 5'UTR      |          | Both     |          |      |
| TSC1   | NM_000368.4    | c.201A>G     | P67P   | synonymous |          | AGRE     |          |      |
| TSC1   | NM_000368.4    | c.210+18A>G  |        | intronic   |          |          | AGRE     |      |
| TSC1   | NM_000368.4    | c.346T>G     | L116V  | missense   |          |          | AGRE     | AGRE |
| TSC1   | NM_000368.4    | c.692C>T     | P231L  | missense   |          |          | AGRE     | AGRE |
| TSC1   | NM_000368.4    | c.871G>A     | D291N  | missense   |          | Both     |          |      |
| TSC1   | NM_000368.4    | c.965T>C     | M322T  | missense   | Both     |          |          |      |
| TSC1   | NM_000368.4    | c.1006C>T    | R336W  | missense   |          |          | AGRE     | AGRE |
| TSC1   | NM_000368.4    | c.1178C>T    | T393I  | missense   |          |          | AGRE     | AGRE |
| TSC1   | NM_000368.4    | c.1335A>G    | E445E  | synonymous | Both     |          |          |      |
| TSC1   | NM_000368.4    | c.1342C>T    | P448S  | missense   |          |          | AGRE     | AGRE |
| TSC1   | NM_000368.4    | c.1580A>G    | Q527R  | missense   |          |          | AGRE     | AGRE |
| TSC1   | NM_000368.4    | c.1701G>A    |        | synonymous |          | Controls |          |      |
| TSC1   | NM_000368.4    | c.1760A>G    | K587R  | missense   | Controls |          |          |      |
| TSC1   | NM_000368.4    | c.1795G>A    | G599R  | missense   |          | Both     |          |      |
| TSC1   | NM_000368.4    | c.1960C>G    | Q654E  | missense   |          |          | AGRE     | AGRE |
| TSC1   | NM_000368.4    | c.1977G>A    | A659A  | synonymous |          | Both     |          |      |
| TSC1   | NM_000368.4    | c.1997+9C>T  |        | intronic   |          |          | Controls |      |
| TSC1   | NM_000368.4    | c.2194C>T    | H732Y  | missense   |          | Both     |          |      |
| TSC1   | NM_000368.4    | c.2285A>G    | N762S  | missense   |          | Both     |          |      |
| TSC1   | NM_000368.4    | c.2392-13T>C |        | intronic   |          |          | AGRE     |      |
| TSC1   | NM_000368.4    | c.2495C>A    | S832Y  | missense   |          | Both     |          |      |
| TSC1   | NM_000368.4    | c.2626-3C>T  |        | intronic   |          |          | AGRE     |      |
| TSC1   | NM_000368.4    | c.2646C>T    | A882A  | synonymous |          | Both     |          |      |
| TSC1   | NM_000368.4    | c.2718A>C    | Q906H  | missense   |          |          | AGRE     | AGRE |
| TSC1   | NM_000368.4    | c.2829C>T    | A943A  | synonymous | Both     |          |          |      |
| TSC1   | NM_000368.4    | c.2865C>T    | T955T  | synonymous |          | Both     |          |      |
| TSC1   | NM_000368.4    | c.3042C>T    | H1014H | synonymous |          | AGRE     |          |      |
| TSC1   | NM_000368.4    | c.3059C>T    | T1020I | missense   |          | Both     |          |      |
| TSC1   | NM_000368.4    | c.3103G>A    | G1035S | missense   |          | Both     |          |      |
| TSC1   | NM_000368.4    | c.3324C>T    | G1108G | synonymous | Controls | AGRE     |          |      |
| TSC2   | NM_000548.3    | c.58G>A      | G20R   | missense   |          | Both     |          |      |

|      |             |              |       |            |          |          |          |          |
|------|-------------|--------------|-------|------------|----------|----------|----------|----------|
| TSC2 | NM_000548.3 | c.138+20C>G  |       | intronic   |          |          | Controls |          |
| TSC2 | NM_000548.3 | c.255C>T     | V85V  | synonymous |          | Both     |          |          |
| TSC2 | NM_000548.3 | c.272C>T     | P91L  | missense   |          | Both     |          |          |
| TSC2 | NM_000548.3 | c.273G>A     | P91P  | synonymous |          | Both     |          |          |
| TSC2 | NM_000548.3 | c.273G>T     | P91P  | synonymous | AGRE     | Controls |          |          |
| TSC2 | NM_000548.3 | c.275A>C     | E92A  | missense   |          | Both     |          |          |
| TSC2 | NM_000548.3 | c.275A>T     | E92V  | missense   | Both     |          |          |          |
| TSC2 | NM_000548.3 | c.286G>A     | E96K  | missense   |          | Both     |          |          |
| TSC2 | NM_000548.3 | c.348G>A     |       | synonymous |          | Controls |          |          |
| TSC2 | NM_000548.3 | c.363C>T     |       | synonymous |          | Both     |          |          |
| TSC2 | NM_000548.3 | c.433G>A     | A145T | missense   |          |          | AGRE     | AGRE     |
| TSC2 | NM_000548.3 | c.482-3C>T   |       | intronic   | Both     |          |          |          |
| TSC2 | NM_000548.3 | c.618C>T     | C206C | synonymous |          | AGRE     |          |          |
| TSC2 | NM_000548.3 | c.648+13C>T  |       | intronic   |          | Both     |          |          |
| TSC2 | NM_000548.3 | c.648+17C>T  |       | intronic   |          | Both     |          |          |
| TSC2 | NM_000548.3 | c.669C>T     |       | synonymous |          | Controls |          |          |
| TSC2 | NM_000548.3 | c.672C>T     |       | synonymous |          | Both     |          |          |
| TSC2 | NM_000548.3 | c.729C>G     |       | synonymous |          | Both     |          |          |
| TSC2 | NM_000548.3 | c.912G>A     | W304* | nonsense   |          | Both     |          |          |
| TSC2 | NM_000548.3 | c.944C>T     | S315L | missense   |          | Both     |          |          |
| TSC2 | NM_000548.3 | c.976-14G>C  |       | intronic   |          |          | Controls |          |
| TSC2 | NM_000548.3 | c.1070C>T    | A357V | missense   |          |          | Controls | Controls |
| TSC2 | NM_000548.3 | c.1100G>A    | R367Q | missense   | Both     |          |          |          |
| TSC2 | NM_000548.3 | c.1110G>A    | Q370Q | synonymous | Controls | AGRE     |          |          |
| TSC2 | NM_000548.3 | c.1116C>T    |       | synonymous |          | Controls |          |          |
| TSC2 | NM_000548.3 | c.1143G>A    | R381R | synonymous |          | AGRE     |          |          |
| TSC2 | NM_000548.3 | c.1276C>T    | L426L | synonymous |          | Controls |          |          |
| TSC2 | NM_000548.3 | c.1281C>A    | I427I | synonymous |          | Both     |          |          |
| TSC2 | NM_000548.3 | c.1292C>T    | A431V | missense   |          |          | AGRE     | AGRE     |
| TSC2 | NM_000548.3 | c.1320C>A    | G440G | synonymous |          | Controls |          |          |
| TSC2 | NM_000548.3 | c.1365C>T    | S455S | synonymous |          | Controls |          |          |
| TSC2 | NM_000548.3 | c.1377C>T    | G459G | synonymous |          | Controls |          |          |
| TSC2 | NM_000548.3 | c.1378G>A    | A460T | missense   |          | Both     |          |          |
| TSC2 | NM_000548.3 | c.1443+15G>A |       | intronic   |          | Both     |          |          |
| TSC2 | NM_000548.3 | c.1578C>T    | S526S | synonymous | Both     |          |          |          |

|      |             |              |        |            |      |          |          |          |
|------|-------------|--------------|--------|------------|------|----------|----------|----------|
| TSC2 | NM_000548.3 | c.1600-14C>T |        | intronic   | Both |          |          |          |
| TSC2 | NM_000548.3 | c.1606G>A    | A536T  | missense   |      | Both     |          |          |
| TSC2 | NM_000548.3 | c.1747G>A    | A583T  | missense   | AGRE |          |          |          |
| TSC2 | NM_000548.3 | c.1819G>A    | A607T  | missense   |      | Both     |          |          |
| TSC2 | NM_000548.3 | c.1839+6G>A  |        | intronic   |      |          | AGRE     |          |
| TSC2 | NM_000548.3 | c.1912G>A    | V638M  | missense   |      |          | AGRE     | AGRE     |
| TSC2 | NM_000548.3 | c.2031C>T    |        | synonymous |      | Both     |          |          |
| TSC2 | NM_000548.3 | c.2049C>T    |        | synonymous |      | Controls |          |          |
| TSC2 | NM_000548.3 | c.2073C>T    |        | synonymous |      | Both     |          |          |
| TSC2 | NM_000548.3 | c.2155T>C    | Y719H  | missense   |      |          | AGRE     | AGRE     |
| TSC2 | NM_000548.3 | c.2545+10C>T |        | intronic   |      |          | Controls |          |
| TSC2 | NM_000548.3 | c.2546-12C>T |        | intronic   | Both |          |          |          |
| TSC2 | NM_000548.3 | c.2580T>C    | F860F  | synonymous | Both |          |          |          |
| TSC2 | NM_000548.3 | c.2621C>T    | P874L  | missense   |      |          | AGRE     | AGRE     |
| TSC2 | NM_000548.3 | c.2640-13C>T |        | intronic   |      |          | Controls |          |
| TSC2 | NM_000548.3 | c.2653A>G    | I885V  | missense   |      |          | Controls | Controls |
| TSC2 | NM_000548.3 | c.2743-3C>A  |        | intronic   |      |          | Controls |          |
| TSC2 | NM_000548.3 | c.2785G>A    | E929K  | missense   |      |          | Controls | Controls |
| TSC2 | NM_000548.3 | c.2838-4A>G  |        | intronic   |      |          | Controls |          |
| TSC2 | NM_000548.3 | c.2917G>A    | E973K  | missense   |      | Both     |          |          |
| TSC2 | NM_000548.3 | c.3126G>T    | P1042P | synonymous |      | AGRE     |          |          |
| TSC2 | NM_000548.3 | c.3132-13C>T |        | intronic   |      |          | Controls |          |
| TSC2 | NM_000548.3 | c.3145G>A    | E1049K | missense   |      | Both     |          |          |
| TSC2 | NM_000548.3 | c.3252C>G    | D1084E | missense   |      |          | AGRE     | AGRE     |
| TSC2 | NM_000548.3 | c.3327G>A    | P1109P | synonymous |      | Controls |          |          |
| TSC2 | NM_000548.3 | c.3429C>T    |        | synonymous |      | Controls |          |          |
| TSC2 | NM_000548.3 | c.3610+6G>A  |        | intronic   |      |          | Controls |          |
| TSC2 | NM_000548.3 | c.3770C>T    | A1257V | missense   |      | Both     |          |          |
| TSC2 | NM_000548.3 | c.3815-15G>A |        | intronic   |      | Both     |          |          |
| TSC2 | NM_000548.3 | c.3815-20C>T |        | intronic   |      |          | Controls |          |
| TSC2 | NM_000548.3 | c.3827C>T    | S1276F | missense   |      |          | AGRE     | AGRE     |
| TSC2 | NM_000548.3 | c.3883+5C>T  |        | intronic   |      | Both     |          |          |
| TSC2 | NM_000548.3 | c.3889G>A    | A1297T | missense   |      | Both     |          |          |
| TSC2 | NM_000548.3 | c.3914C>T    | P1305L | missense   |      |          | AGRE     | AGRE     |
| TSC2 | NM_000548.3 | c.3915G>A    |        | synonymous |      | Controls |          |          |

|       |             |              |        |            |      |          |          |          |
|-------|-------------|--------------|--------|------------|------|----------|----------|----------|
| TSC2  | NM_000548.3 | c.3919G>A    | E1307K | missense   |      | Both     |          |          |
| TSC2  | NM_000548.3 | c.3974G>A    | G1325D | missense   |      |          | AGRE     | AGRE     |
| TSC2  | NM_000548.3 | c.3986G>A    | R1329H | missense   |      | Both     |          |          |
| TSC2  | NM_000548.3 | c.4006-8C>T  |        | intronic   |      | Both     |          |          |
| TSC2  | NM_000548.3 | c.4047G>A    | A1349A | synonymous |      | Controls |          |          |
| TSC2  | NM_000548.3 | c.4051G>A    | E1351K | missense   |      |          | AGRE     | AGRE     |
| TSC2  | NM_000548.3 | c.4269G>A    | L1423L | synonymous |      | Both     |          |          |
| TSC2  | NM_000548.3 | c.4285G>T    | A1429S | missense   |      | Both     |          |          |
| TSC2  | NM_000548.3 | c.4316G>A    | G1439D | missense   |      |          | AGRE     | AGRE     |
| TSC2  | NM_000548.3 | c.4341C>T    |        | synonymous |      | AGRE     |          |          |
| TSC2  | NM_000548.3 | c.4403C>T    | P1468L | missense   |      | Both     |          |          |
| TSC2  | NM_000548.3 | c.4460C>G    | S1487C | missense   |      |          | AGRE     | AGRE     |
| TSC2  | NM_000548.3 | c.4506G>A    | L1502L | synonymous |      | Controls |          |          |
| TSC2  | NM_000548.3 | c.4536C>T    | D1512D | synonymous |      | Both     |          |          |
| TSC2  | NM_000548.3 | c.4735G>A    | G1579S | missense   |      |          | Controls | Controls |
| TSC2  | NM_000548.3 | c.4959C>T    | S1653S | synonymous | AGRE | Controls |          |          |
| TSC2  | NM_000548.3 | c.4983C>T    | T1661T | synonymous |      | Controls |          |          |
| TSC2  | NM_000548.3 | c.4990-7C>T  |        | intronic   |      | Both     |          |          |
| TSC2  | NM_000548.3 | c.5028G>A    | L1676L | synonymous |      | AGRE     |          |          |
| TSC2  | NM_000548.3 | c.5048T>G    | V1683G | missense   |      | Both     |          |          |
| TSC2  | NM_000548.3 | c.5050T>G    | S1684A | missense   | Both |          |          |          |
| TSC2  | NM_000548.3 | c.5068+6G>A  |        | intronic   |      |          | Controls |          |
| TSC2  | NM_000548.3 | c.5069-8C>T  |        | intronic   |      |          | AGRE     |          |
| TSC2  | NM_000548.3 | c.5131G>A    | V1711M | missense   |      |          | Controls | Controls |
| TSC2  | NM_000548.3 | c.5161-10A>C |        | intronic   | Both |          |          |          |
| TSC2  | NM_000548.3 | c.5175G>A    |        | synonymous |      | AGRE     |          |          |
| TSC2  | NM_000548.3 | c.5202T>C    | D1734D | synonymous | Both |          |          |          |
| TSC2  | NM_000548.3 | c.5321G>C    | S1774T | missense   |      | Both     |          |          |
| TSC2  | NM_000548.3 | c.5359G>A    | G1787S | missense   |      | Both     |          |          |
| TSC2  | NM_000548.3 | c.5383C>T    | R1795C | missense   |      | Both     |          |          |
| TSC2  | NM_000548.3 | c.5397G>C    | S1799S | synonymous | Both |          |          |          |
| TSC2  | NM_000548.3 | c.5429G>A    |        | 3'UTR      |      |          | AGRE     | AGRE     |
| TSC2  | NM_000548.3 | c.5450G>A    |        | 3'UTR      |      |          | AGRE     | AGRE     |
| UBE3A | NM_130839.1 | c.333C>G     | N111K  | missense   |      |          | AGRE     | AGRE     |
| UBE3A | NM_130839.1 | c.373T>C     |        | synonymous |      | Both     |          |          |

|       |             |              |       |            |      |      |          |  |
|-------|-------------|--------------|-------|------------|------|------|----------|--|
| UBE3A | NM_130839.1 | c.477A>T     |       | synonymous |      | Both |          |  |
| UBE3A | NM_130839.1 | c.592G>A     | A198T | missense   | AGRE |      |          |  |
| UBE3A | NM_130839.1 | c.618A>T     | A206A | synonymous |      | Both |          |  |
| UBE3A | NM_130839.1 | c.1269C>T    |       | synonymous |      | AGRE |          |  |
| UBE3A | NM_130839.1 | c.1773A>G    |       | synonymous |      | Both |          |  |
| UBE3A | NM_130839.1 | c.2124+9T>C  |       | intronic   |      |      | Controls |  |
| UBE3A | NM_130839.1 | c.2498+19G>C |       | intronic   |      |      | Controls |  |
| UBE3A | NM_130839.1 | c.2618A>G    |       | synonymous |      | Both |          |  |
| UBE3A | NM_130839.1 | c.2637T>C    |       | 3'UTR      | Both |      |          |  |

All variants in 18 mGluR pathway genes that were concordantly detected on both NGS platforms are listed and annotated in terms of their location and consequence, occurrence in AGRE and/or control groups, minor allele frequency (maf), and functional significance as outlined in Fig. 2B.
